# Supplementary material for: Postsynaptic cAMP signalling regulates the antagonistic balance of Drosophila glutamate receptor subtypes
Source: Oxford University Press journal article supplement (doi:10.1242/dev.191874), 2020-11-24
Supplement: dev191874supp.pdf [file dev191874supp.pdf]

## Supplementary Information

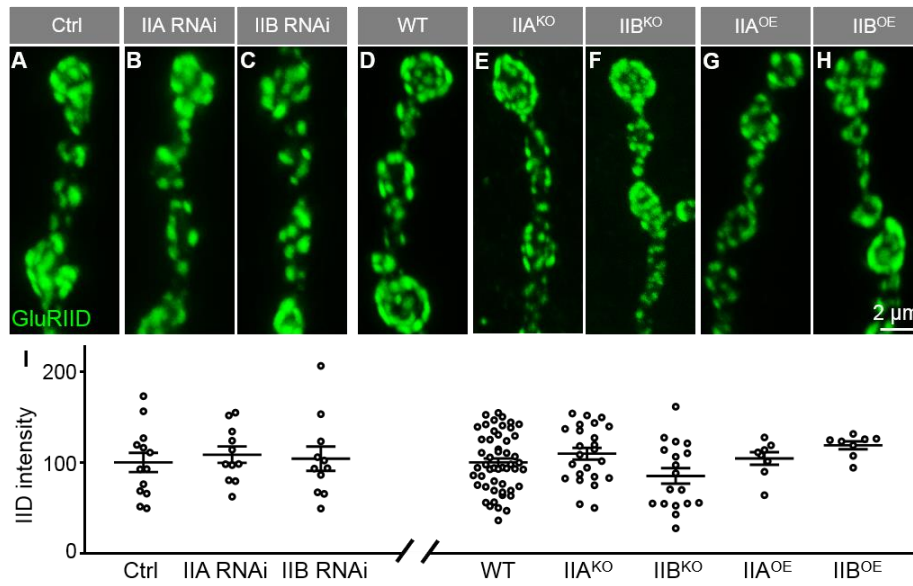

**Fig. S1. Synaptic levels of GluRIID are normal when mutual negative regulation of GluRIIA and GluRIIB is induced.** (A–H) Representative confocal images of third-instar larval NMJ4 stained with anti-GluRIID (green). The genotypes are Control (Ctrl: *C57-Gal4*, *UAS-Dicer2*/+), IIA RNAi (*C57-Gal4*, *UAS-Dicer2/UAS-GluRIIA-RNAi*), IIB RNAi (*C57-Gal4*, *UAS-Dicer2/UAS-GluRIIB-RNAi*), WT (*w<sup>1118</sup>*), IIA<sup>KO</sup> (*GluRIIA<sup>SP16</sup>*), IIB<sup>KO</sup>, IIA<sup>OE</sup> (*Mhc-GluRIIA*), and IIB<sup>OE</sup> (*Mhc-GluRIIB*). Scale bar: 2 μm. (I) Quantification of the fluorescence intensities of anti-GluRIID staining at the NMJ of different genotypes. Data are expressed as percentages of the Ctrl or WT fluorescence intensity.  $n \geq 11$  NMJs for each genotype in A–C,  $n \geq 18$  for each genotype in D–F, and  $n = 8$  for each genotype in G and H. Error bars indicate s.e.m.

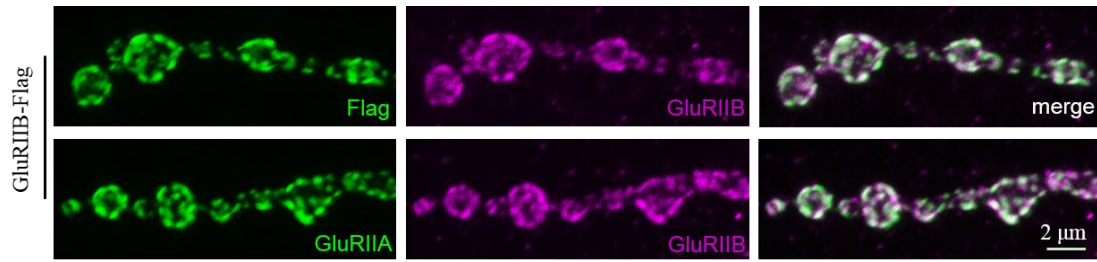

**Fig. S2. Flag signals completely overlap with GluRIIB signals.** Representative confocal images of third-instar larval NMJ4 co-stained with anti-GluRIIB (magenta) and anti-GluRIIA or anti-Flag (green). The genotype is homozygous *GluRIIB-Flag*. Scale bar: 2 μm.

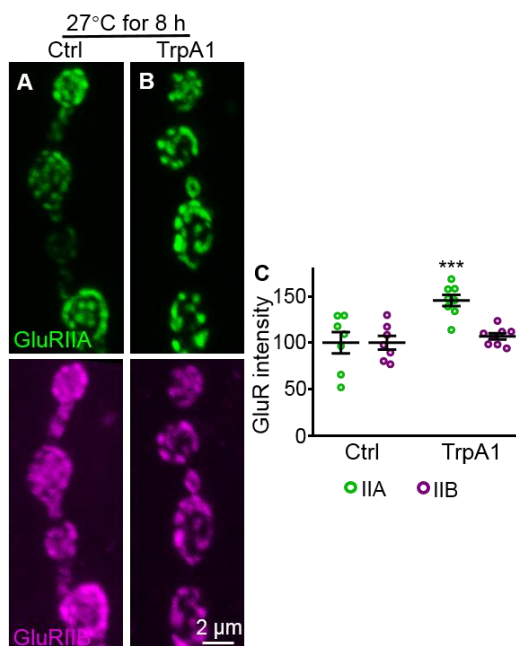

**Fig. S3. Synaptic GluRIIA increases but GluRIIB remains unchanged when presynaptic neurotransmitter release is enhanced.** (A,B) Representative confocal images of third-instar larval NMJ4 co-stained with anti-GluRIIA (green) and anti-GluRIIB (magenta). The genotypes are Control (A, *OK6-Gal4/+*) and TRPA1 (B, *OK6-Gal4/UAS-TRPA1*). Control and TRPA1 were intermittently stimulated by high temperature at 27°C for 8 h. Scale bar: 2 μm. (C) Quantification of the fluorescence intensities of anti-GluRIIA and anti-GluRIIB at the NMJ of different genotypes.  $n \geq 7$ . \*\*\* $p < 0.001$ . Error bars indicate s.e.m.

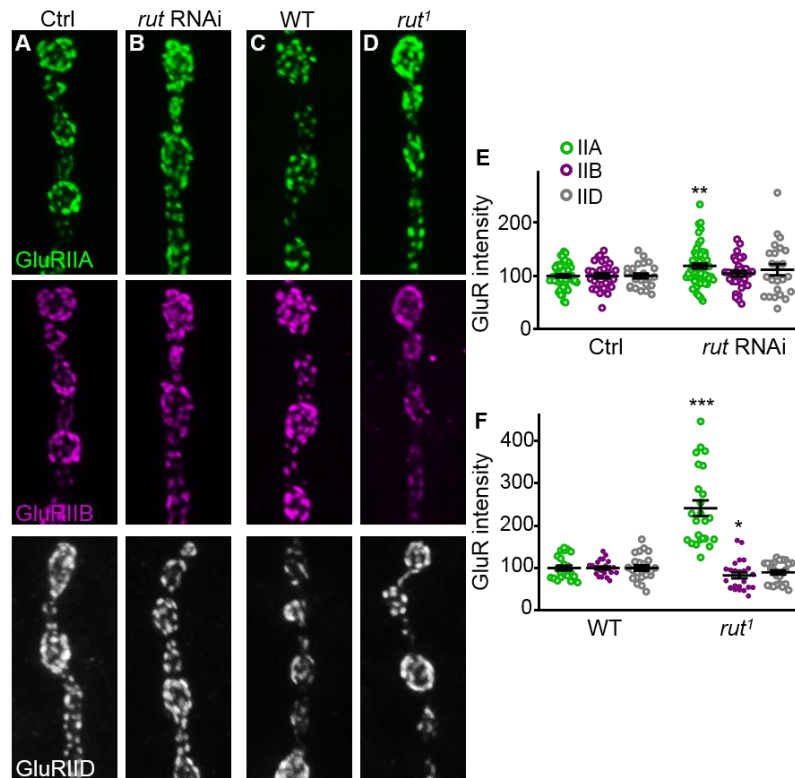

**Fig. S4. cAMP downregulation results in increased GluRIIA but normal or reduced GluRIIB at NMJ synapses.** (A–D) Representative images of NMJ4 synapses from different genotypes stained with anti-GluRIIA (green), anti-GluRIIB (magenta), and anti-GluRIID (gray). The genotypes are Control (Ctrl, *C57-Gal4/+*), *rut* RNAi (*UAS-rut-RNAi/+; C57-Gal4/+*), WT (*w<sup>1118</sup>*) and *rut*<sup>1</sup>. Scale bar: 2  $\mu$ m. (E,F) Normalized intensities of the three GluR subunits at NMJ synapses from different genotypes.  $n \geq 24$  for each genotypes. \* $p < 0.05$ ; \*\* $p < 0.01$ ; \*\*\* $p < 0.001$ . Error bars indicate s.e.m.

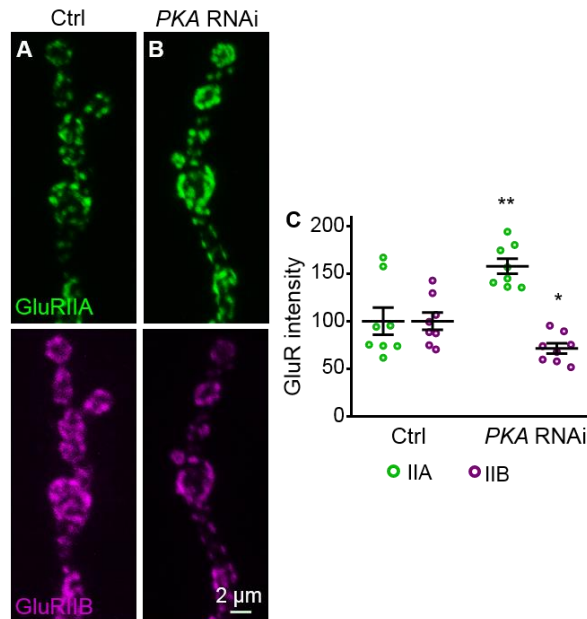

**Fig. S5. Knockdown of *PKA-C1* in postsynaptic muscles leads to increased GluRIIA but reduced GluRIIB.** (A,B) Representative images of NMJ4 synapses co-stained with anti-GluRIIA (green) and anti-GluRIIB (magenta). The genotypes are Control (Ctrl, *C57-Gal4/+*) and *PKA-C1* RNAi (*C57-Gal4/UAS-PKA-C1-RNAi*). Scale bar: 2 μm. (C) Normalized intensities of two GluR subunits at NMJ synapses.  $n \geq 8$  for each genotypes. \* $p < 0.05$ ; \*\* $p < 0.01$ . Error bars indicate s.e.m.

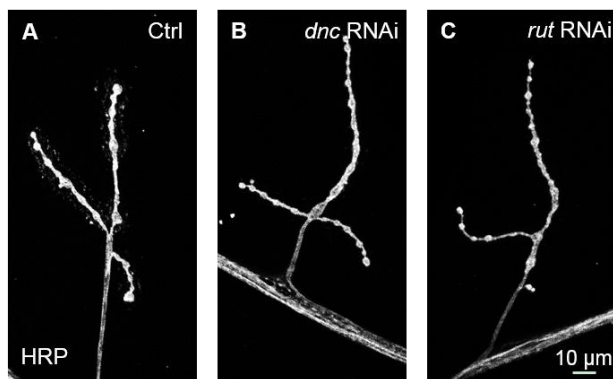

**Fig. S6. The number of varicosities remains normal when *dnc* or *rut* is knocked down by RNAi in postsynaptic muscles.** (A–C) Representative images of NMJ4 synapses stained with anti-HRP (gray). The genotypes are Control (Ctrl, *C57-Gal4/+*), *dnc* RNAi (*C57-Gal4/UAS-dnc* RNAi) and *rut* RNAi (*C57-Gal4/UAS-rut* RNAi). Scale bar: 10 μm.

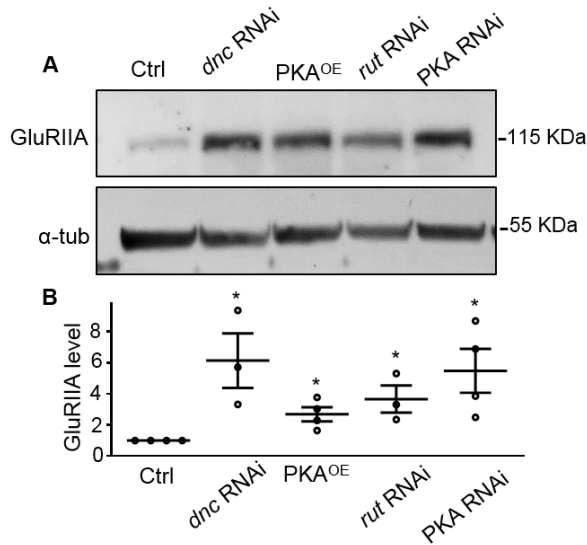

**Fig. S7. The protein level of GluRIIA increases significantly when cAMP pathway is up- or down-regulated.** (A) Representative western blots of muscle lysates probed with anti-GluRIIA. The full genotypes are as follows: Ctrl (*C57-Gal4/+*), *dnc* RNAi (*C57-Gal4/UAS-dnc RNAi*), PKA<sup>OE</sup> (*C57-Gal4/UAS-PKA<sup>OE</sup>*), *rut* RNAi (*UAS-rut-RNAi/+; C57-Gal4/+*), and *PKA-C1* RNAi (*C57-Gal4/UAS-PKA-C1-RNAi*).  $\alpha$ -tubulin was used as a loading control. (B) Quantification of GluRIIA protein levels normalized to the  $\alpha$ -tubulin control in different genotypes.  $n \geq 3$ . \* $p < 0.05$ . Error bars indicate s.e.m.

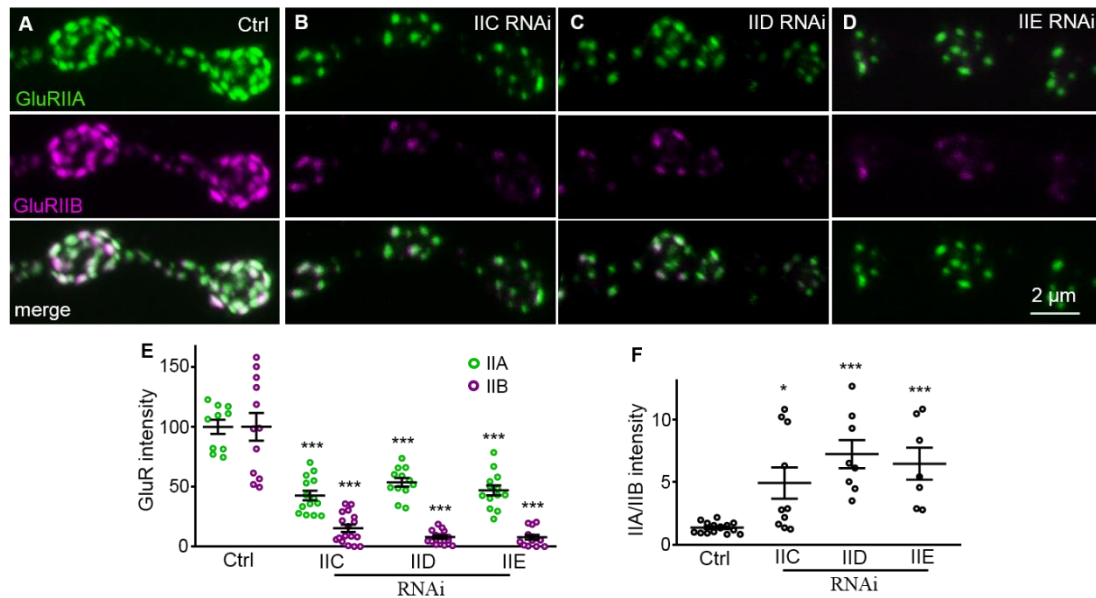

**Fig. S8. Synaptic GluRIIA and GluRIIB decrease with the balance shifting towards more GluRIIA when an essential subunit of GluRs is knocked down.** (A–D) Representative confocal images of late third-instar larval NMJ4 stained with anti-GluRIIA (green) and anti-GluRIIB (magenta). Full genotypes are as follows: Ctrl (*C57-Gal4/+*), IIC RNAi (*C57-Gal4/UAS-IIC RNAi*), IID RNAi (*C57-Gal4/UAS-IID RNAi*), and IIE RNAi (*C57-Gal4/UAS-IIE RNAi*). Scale bar: 2 μm. (E) Quantification of the intensities of anti-GluRIIA and anti-GluRIIB staining at the NMJ. Data are expressed as normalized staining intensities with respect to Ctrl.  $n \geq 10$  for each genotype. (F) Quantification of the ratio of GluRIIA to GluRIIB intensities. \* $p < 0.05$ ; \*\*\* $p < 0.001$ . Error bars indicate s.e.m.

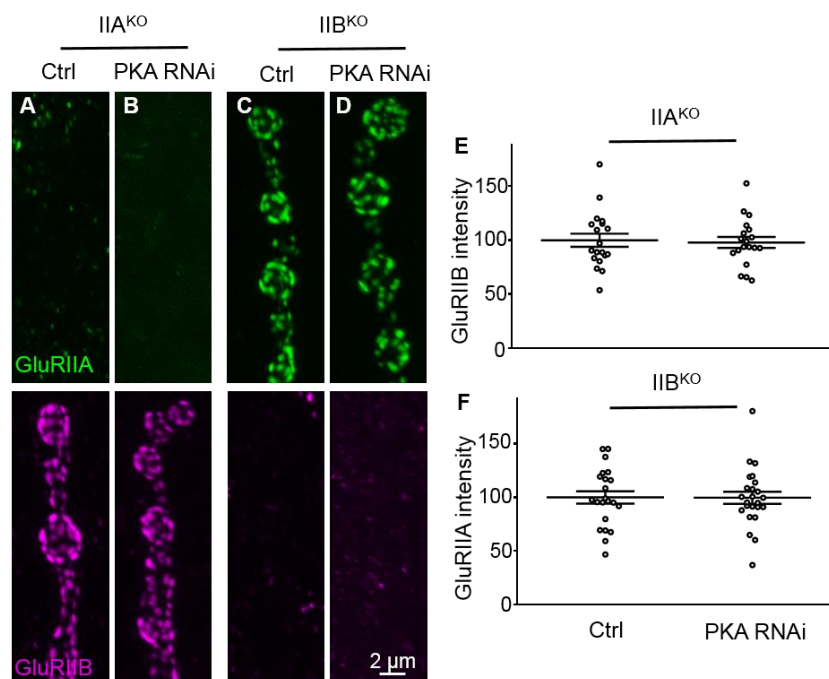

**Fig. S9. The antagonistic balance of GluRIIA/GluRIIB does not require the cAMP pathway on the postsynaptic side.** (A–D) Representative images of NMJ4 synapses from different genotypes stained with anti-GluRIIA (green) and anti-GluRIIB (magenta): *IIA<sup>KO</sup>* Ctrl (*IIA<sup>SP16</sup>; C57-Gal4/+*, A), *IIA<sup>KO</sup>* PKA RNAi (*IIA<sup>SP16</sup>; C57-Gal4/UAS-PKA RNAi*, B), *IIB<sup>KO</sup>* Ctrl (*IIB<sup>KO</sup>; C57-Gal4/+*, C), and *IIB<sup>KO</sup>* PKA RNAi (*IIB<sup>KO</sup>; C57-Gal4/UAS-PKA RNAi*, D). Scale bar: 2  $\mu$ m. (E,F) Normalized intensities of GluRIIB and GluRIIA at NMJ synapses from different genotypes.  $n \geq 19$  for each genotype. Error bars indicate s.e.m.

Table S1. Genes that do not affect synaptic expression of GluRIIA and GluRIIB when knocked down by *C57-Gal4*-driven RNAi in postsynaptic muscles

[Click here to Download Table S1](#)
